# Supplementary material for: Publication of Clinical Trials Supporting Successful New Drug Applications: A Literature Analysis
Source: PLOS journal article supplement (doi:10.1371/journal.pmed.0050191), 2008-09-18
Supplement: S1 (10.1371/journal.pmed.0050191.s001) [file journal.pmed.0050191.s001]

| **Table S1** | | | | | | | |  |
| --- | --- | --- | --- | --- | --- | --- | --- | --- |
|  | **Drug ID** | **# Trials** | **# Published** | **%** | **# Pivotal Trials in Drug Label** | **# Pivotal Trials Published** | **%** | |
|  | 1 | 12 | 7 | 58 | 4 | 3 | 75 | |
|  | 2 | 2 | 1 | 50 | 2 | 1 | 50 | |
|  | 3 | 5 | 5 | 100 | 5 | 5 | 100 | |
|  | 4 | 3 | 2 | 67 | 3 | 2 | 67 | |
|  | 5 | 15 | 9 | 60 | 2 | 1 | 50 | |
|  | 6 | 6 | 2 | 33 | 4 | 2 | 50 | |
|  | 7 | 3 | 1 | 33 | 2 | 1 | 50 | |
|  | 8 | 6 | 3 | 50 | 3 | 3 | 100 | |
|  | 9 | 6 | 4 | 67 | 3 | 2 | 67 | |
|  | 10 | 2 | 2 | 100 | 2 | 2 | 100 | |
|  | 11 | 21 | 9 | 43 | 5 | 4 | 80 | |
|  | 12 | 8 | 6 | 75 | 2 | 2 | 100 | |
|  | 13 | 31 | 15 | 48 | 16 | 15 | 94 | |
|  | 14 | 3 | 1 | 33 | 1 | 1 | 100 | |
|  | 15 | 23 | 7 | 30 | 14 | 6 | 43 | |
|  | 16 | 5 | 4 | 80 | 5 | 4 | 80 | |
|  | 17 | 6 | 2 | 33 | 3 | 2 | 67 | |
|  | 18 | 52 | 5 | 10 | 8 | 5 | 63 | |
|  | 19 | 17 | 6 | 35 | 7 | 4 | 57 | |
|  | 20 | 9 | 5 | 56 | 8 | 5 | 63 | |
|  | 21 | 6 | 3 | 50 | 2 | 2 | 100 | |
|  | 22 | 2 | 2 | 100 | 2 | 2 | 100 | |
|  | 23 | 7 | 3 | 43 | 0 | 0 | 0 | |
|  | 24 | 39 | 8 | 21 | 4 | 4 | 100 | |
|  | 25 | 6 | 3 | 50 | 2 | 2 | 100 | |
|  | 26 | 10 | 4 | 40 | 4 | 3 | 75 | |
|  | 27 | 7 | 4 | 57 | 3 | 3 | 100 | |
|  | 28 | 4 | 4 | 100 | 2 | 2 | 100 | |
|  | 29 | 13 | 5 | 38 | 2 | 2 | 100 | |
|  | 30 | 3 | 2 | 67 | 3 | 2 | 67 | |
|  | 31 | 4 | 2 | 50 | 3 | 1 | 33 | |
|  | 32 | 15 | 4 | 27 | 3 | 3 | 100 | |
|  | 33 | 3 | 3 | 100 | 0 | 0 | 0 | |
|  | 34 | 18 | 5 | 28 | 2 | 2 | 100 | |
|  | 35 | 4 | 3 | 75 | 3 | 3 | 100 | |
|  | 36 | 4 | 3 | 75 | 0 | 0 | 0 | |
|  | 37 | 6 | 5 | 83 | 3 | 2 | 67 | |
|  | 38 | 6 | 3 | 50 | 6 | 5 | 83 | |
|  | 39 | 4 | 4 | 100 | 3 | 3 | 100 | |
|  | 40 | 8 | 2 | 25 | 2 | 2 | 100 | |
|  | 41 | 4 | 4 | 100 | 3 | 3 | 100 | |
|  | 42 | 12 | 6 | 50 | 3 | 2 | 67 | |
|  | 43 | 5 | 3 | 60 | 3 | 2 | 67 | |
|  | 44 | 7 | 4 | 57 | 2 | 2 | 100 | |
|  | 45 | 13 | 8 | 62 | 5 | 5 | 100 | |
|  | 46 | 10 | 2 | 20 | 2 | 2 | 100 | |
|  | 47 | 3 | 2 | 67 | 2 | 2 | 100 | |
|  | 48 | 8 | 3 | 38 | 5 | 2 | 40 | |
|  | 49 | 8 | 5 | 63 | 5 | 4 | 80 | |
|  | 50 | 15 | 8 | 53 | 2 | 2 | 100 | |
|  | 51 | 9 | 3 | 33 | 6 | 2 | 33 | |
|  | 52 | 10 | 5 | 50 | 8 | 4 | 50 | |
|  | 53 | 7 | 4 | 57 | 2 | 2 | 100 | |
|  | 54 | 8 | 6 | 75 | 7 | 5 | 71 | |
|  | 55 | 12 | 4 | 33 | 2 | 2 | 100 | |
|  | 56 | 43 | 10 | 23 | 5 | 4 | 80 | |
|  | 57 | 2 | 2 | 100 | 2 | 2 | 100 | |
|  | 58 | 9 | 2 | 22 | 3 | 1 | 33 | |
|  | 59 | 5 | 3 | 60 | 2 | 2 | 100 | |
|  | 60 | 8 | 1 | 13 | 2 | 1 | 50 | |
|  | 61 | 12 | 7 | 58 | 6 | 5 | 83 | |
|  | 62 | 5 | 5 | 100 | 2 | 2 | 100 | |
|  | 63 | 10 | 8 | 80 | 7 | 5 | 71 | |
|  | 64 | 13 | 5 | 38 | 4 | 3 | 75 | |
|  | 65 | 4 | 0 | 0 | 1 | 0 | 0 | |
|  | 66 | 15 | 2 | 13 | 2 | 2 | 100 | |
|  | 67 | 10 | 7 | 70 | 5 | 4 | 80 | |
|  | 68 | 20 | 9 | 45 | 4 | 3 | 75 | |
|  | 69 | 30 | 15 | 50 | 8 | 7 | 88 | |
|  | 70 | 8 | 5 | 63 | 8 | 5 | 63 | |
|  | 71 | 5 | 1 | 20 | 2 | 1 | 50 | |
|  | 72 | 6 | 6 | 100 | 6 | 6 | 100 | |
|  | 73 | 56 | 19 | 34 | 12 | 11 | 92 | |
|  | 74 | 2 | 2 | 100 | 2 | 2 | 100 | |
|  | 75 | 2 | 1 | 50 | 2 | 1 | 50 | |
|  | 76 | 11 | 2 | 18 | 2 | 2 | 100 | |
|  | 77 | 7 | 3 | 43 | 6 | 3 | 50 | |
|  | 78 | 3 | 3 | 100 | 1 | 1 | 100 | |
|  | 79 | 4 | 2 | 50 | 2 | 2 | 100 | |
|  | 80 | 2 | 2 | 100 | 2 | 2 | 100 | |
|  | 81 | 3 | 3 | 100 | 3 | 3 | 100 | |
|  | 82 | 10 | 3 | 30 | 3 | 3 | 100 | |
|  | 83 | 4 | 3 | 75 | 4 | 3 | 75 | |
|  | 84 | 7 | 4 | 57 | 1 | 1 | 100 | |
|  | 85 | 5 | 2 | 40 | 4 | 2 | 50 | |
|  | 86 | 5 | 2 | 40 | 2 | 2 | 100 | |
|  | 87 | 8 | 2 | 25 | 2 | 2 | 100 | |
|  | 88 | 20 | 9 | 45 | 11 | 4 | 36 | |
|  | 89 | 17 | 6 | 35 | 4 | 3 | 75 | |
|  | 90 | 3 | 3 | 100 | 3 | 3 | 100 | |
|  | **TOTAL** | **909** | **394** |  | **340** | **257** |  | |
|  | Mean | 10 | 4 | 55 | 4 | 3 | 77 | |
|  | SD | 10 | 3 | 26 | 3 | 2 | 27 | |
|  | Median | 7 | 4 | 50 | 3 | 2 | 83 | |
|  | Range | 2-56 | 0-19 | 0-100 | 0-16 | 0-15 | 0-100 | |
